# Supplementary material for: Stringing MOF-derived nanocages: a strategy for the enhanced oxygen evolution reaction
Source: Royal Society of Chemistry journal article supplement (doi:10.1039/c9ta00624a), 2019-01-01
Supplement: c9ta00624a1.pdf [file c9ta00624a1.pdf]

## Supporting Information

### Stringing MOF-Derived Nanocages Strategy for Enhanced Oxygen Evolution Reactions

Huajie Xu,<sup>ab</sup> Yiwei Yang,<sup>a</sup> Xiaoxi Yang,<sup>a</sup> Jing Cao,<sup>\*a</sup> Weisheng Liu,<sup>a</sup> and Yu Tang<sup>\*a</sup>

<sup>a</sup> State Key Laboratory of Applied Organic Chemistry, Key Laboratory of Nonferrous Metal Chemistry and Resources Utilization of Gansu Province, College of Chemistry and Chemical Engineering, Lanzhou University, Lanzhou 730000, People's Republic of China

<sup>b</sup> School of Chemical and Material Engineering, Fuyang Normal University, Fuyang 236037, People's Republic of China

\*Email: tangyu@lzu.edu.cn, caoj@lzu.edu.cn

## Contents

### 1. Experimental section

- 1.1. Preparation of CeO<sub>2</sub> nanorods (CeO<sub>2</sub>NRs) and CeO<sub>2</sub> nanoparticles (CeO<sub>2</sub> NPs)
- 1.2. Preparation of the ZIF-67@CeO<sub>2</sub>NRs Templates
- 1.3. Preparation of the CoS@CeO<sub>2</sub>NRs
- 1.4. Preparation of the CeO<sub>x</sub>/CoS@CeO<sub>2</sub>NRs
- 1.5. Preparation of hollow CeO<sub>x</sub>/CoS

### 2. Materials characterization.

### 3. Electrochemical measurement.

### 4. Supplementary Figures

Fig. S1. The SEM image for CeO<sub>2</sub> nanorods with 0.01 mM of sodium dihydrogen phosphate dehydrate.

Fig. S2. The SEM image for CeO<sub>2</sub> nanorods with 0.05 mM, 0.1 mM and 0.2 mM of sodium dihydrogen phosphate dehydrate.

Fig. S3. The TEM image for CeO<sub>2</sub> nanorods with 0.2 mM of sodium dihydrogen phosphate dehydrate.

Fig. S4. XRD patterns for CeO<sub>2</sub> nanorods with 0.2 mM of sodium dihydrogen phosphate dehydrate.

Fig. S5. The SEM image for ZIF-67@L-CeO<sub>2</sub>NRs.

Fig. S6. XRD patterns of ZIF-67 and ZIF-67@L-CeO<sub>2</sub>NRs.

Fig. S7. The SEM image for CeO<sub>x</sub>/CoS@L-CeO<sub>2</sub>NRs.

Fig. S8. N<sub>2</sub> absorption/desorption isotherms of CeO<sub>x</sub>/CoS@L-CeO<sub>2</sub>NRs.

Fig. S9. Pore size distribution of CeO<sub>x</sub>/CoS@L-CeO<sub>2</sub>NRs..

Fig. S10. EDX spectrum of CeO<sub>x</sub>/CoS@L-CeO<sub>2</sub>NRs.

Fig. S11 The strain tensor map generated from the HRTEM image on the surface of CeO<sub>x</sub>/CoS polyhedrons using geometric phase analysis.

Fig. S12. The SEM and TEM images for CeO<sub>x</sub>/CoS@S-CeO<sub>2</sub>NRs (a and b). c) Elemental mapping images of CeO<sub>x</sub>/CoS@S-CeO<sub>2</sub>NRs.

Fig. S13. XPS spectra of Co 2p for  $\text{CeO}_x/\text{CoS}@L\text{-CeO}_2\text{NRs}$  and  $\text{CeO}_x/\text{CoS}@S\text{-CeO}_2\text{NRs}$ .

Fig. S14. (a-c) Typical cyclic voltammetry curves of  $\text{CeO}_x/\text{CoS}@L\text{-CeO}_2\text{NRs}$ ,  $\text{CeO}_x/\text{CoS}@S\text{-CeO}_2\text{NRs}$  and  $\text{CeO}_x/\text{CoS}$  in 1M KOH with different scan rates. (d) Capacitive J versus scan rate for  $\text{CeO}_x/\text{CoS}@L\text{-CeO}_2\text{NRs}$ ,  $\text{CeO}_x/\text{CoS}@S\text{-CeO}_2\text{NRs}$  and  $\text{CeO}_x/\text{CoS}$ .

Fig. S15. SEM micrograph of  $\text{CeO}_x/\text{CoS}@L\text{-CeO}_2\text{NRs}$  after the OER reaction.

Fig. S16. XPS spectra of Co 2p before and after the OER reaction for  $\text{CeO}_x/\text{CoS}@L\text{-CeO}_2\text{NRs}$ .

Fig. S17. XPS spectra of Ce 3d before and after the OER reaction for  $\text{CeO}_x/\text{CoS}@L\text{-CeO}_2\text{NRs}$ .

## 5. Supplementary Tables

Table S1 Comparison of catalytic performance with reported Co-based catalyst.

## 1. Experimental section

### 1.1 Preparation of CeO<sub>2</sub> nanorods (CeO<sub>2</sub>NRs) and CeO<sub>2</sub> nanoparticles (CeO<sub>2</sub> NPs)

Typically, 4 mmol cerium(III) nitrate hexahydrate and different moles of sodium dihydrogen phosphate dehydrate (0.01 mmol, 0.05 mmol, 0.1 mmol, and 0.2 mmol) were dissolved in 15 mL distilled water. After being stirred at room temperature for 60 min, the mixed solution was transferred into a 20 mL Teflon-lined stainless autoclave and heated at 200°C for 144 h under autogenous pressure and static conditions in an electric oven. Upon leaving the solution cool to room temperature, the precipitates were separated by centrifuging, washed with distilled water and ethanol three times in turn, and then dried at 60°C for 1 day.

2 mmol Ce(NO<sub>3</sub>)<sub>3</sub>·6H<sub>2</sub>O was dissolved in 40 mL deionized water. Then, 2.5 mL of ammonia was added, and stirred for 30 min at room temperature, followed by being transferred to a 50 mL Teflon-lined stainless-steel autoclave. The autoclave was sealed and placed in an oven at 180 °C for 6 h and then cooled down naturally, and the precipitates were harvested by several rinsing-centrifugation cycles with deionized (DI) water and ethanol and then dried at 50 °C.

### 1.2 Preparation of the ZIF-67@CeO<sub>2</sub>NR Templates

8.6 milligrams of the different length of CeO<sub>2</sub> nanorods was redispersed in 20 mL of ethanol under sonication for 30 min to obtain a homogeneous solution. 1 g of polyvinylpyrrolidone (PVP, average mol. wt. 40000) was added to the solution while stirring. A quarter later, the methanol solution of cobalt nitrate hexahydrate (0.873 g, 5 mL) was added drop by drop. On the other hand, 2-Methylimidazole (0.984 g) was dissolved in methanol (5 mL) to generate another clear solution. Then, the two solutions were mixed rapidly together. The mixture was kept still at room temperature for 12 h. After that, the precipitates were collected, separated by centrifugation, washed carefully with methanol, and dried at 80 °C overnight.

### 1.3. Preparation of the CoS@CeO<sub>2</sub>NR

Twenty-five milligrams of ZIF-67@CeO<sub>2</sub>NR was redispersed in 20 mL of ethanol under sonication for 30 min to obtain a homogeneous solution, then 0.2 g of

thioacetamide was added to the solution while stirring. The mixture was kept at 90 °C for 1 h. After being cooled to room temperature naturally, the black precipitates were harvested by several rinsing-centrifugation cycles with deionized (DI) water and ethanol and then dried at 50 °C.

#### 1.4. Preparation of CeO<sub>x</sub>/CoS@CeO<sub>2</sub>NR

0.18 g of CoS@CeO<sub>2</sub>NR was first dispersed in 15 mL of absolute ethyl alcohol, and after 30 mins of sonication, a homogeneous slurry was formed, followed by the addition of 0.15 mmol of hexamethylenetetramine (HMT) and 0.05 mmol Ce(NO<sub>3</sub>)<sub>3</sub>·6H<sub>2</sub>O. The mixture was kept stirring for 30 mins at room temperature, followed by being transferred to a 50 mL Teflon-lined stainless-steel autoclave. The autoclave was sealed and placed in an oven at 180 °C for 6 h and then cooled down naturally, and the precipitates were harvested by several rinsing-centrifugation cycles with deionized (DI) water and ethanol and then dried at 50 °C.

#### 1.5. Preparation of hollow CeO<sub>x</sub>/CoS

Preparation of CeO<sub>x</sub>/CoS is similar with CeO<sub>x</sub>/CoS@CeO<sub>2</sub>NR, and only the CeO<sub>2</sub> nanorods were not added in the synthesis of ZIF-67.

## **2. Materials characterization.**

Transmission electron microscopy (TEM), high-resolution transmission electron microscopy (HRTEM) and elemental mapping were performed on a JEOL JEM 2100 TEM (200kV). Scanning electron microscopy was performed on Carl Zeiss. The chemical compositions were investigated by energy dispersive X-ray spectroscopy (EDX). X-ray diffraction (XRD) patterns were collected on an X'Pert Pro X-ray diffractometer with Cu K $\alpha$  radiation ( $\lambda = 0.1542$  nm) (40 kV and 40 mA). X-ray photoelectron spectroscopy (XPS) spectra were recorded on a VG ESCALAB 220I-XL device and corrected using C1s line at 284.6 eV. The Brunauer-Emmett-Teller (BET) specific surface area was determined using N<sub>2</sub> adsorption–desorption on an Autosorb-IQ2-MPC system, and the pore size distribution was computed based on quenched solid density functional theory using the adsorption branch. The Raman spectra were obtained with a Horiba Raman spectrometer model via using a 532 nm line of Ar<sup>+</sup> ion laser as the excitation source at room temperature.

### 3. Electrochemical measurement.

Electrochemical measurements were carried out in a typical three-electrode glass cell connected to a CHI 760E Electrochemical Workstation (CHI Instruments, Shanghai Chenhua Instrument Corp., China), comprising a platinum foil counter electrode, a saturated Hg/HgO reference electrode, and a glassy carbon working electrode coated with electrocatalysts. The catalysts were uniformly cast onto a glassy carbon electrode with a total loading of  $200 \mu\text{g cm}^{-2}$ . Before each test, the working electrode was fabricated as follows. 5.0 mg electrocatalysts were first dispersed in 0.95 mL ethanol, and then 0.05 mL Nafion solution (5.0 wt%) was added, followed by 1.0 h sonication. 10.0  $\mu\text{L}$  suspension was pipetted onto a glassy carbon electrode, which was mechanically polished and ultrasonically washed in advance. Ultimately, the working electrode was prepared after solvent evaporation in air for 10.0 min. All potentials were calculated with respect to reversible hydrogen electrode (RHE) based on:  $E(\text{RHE}) = E(\text{Hg/HgO}) + 0.059 \times \text{pH} + 0.098 \text{ V}$ . The overpotential ( $\eta$ ) was calculated by  $\eta(\text{V}) = E(\text{RHE}) - 1.23\text{V}$ . Linear sweep voltammetry (LSV) and cyclic voltammetry (CV) measurements were recorded at a scan rate of  $1 \text{ mV s}^{-1}$ . The potential was calibrated with respect to a reversible hydrogen electrode (RHE) in 1 M KOH solution. 1M KOH solution was bubbled for about fifteen minutes to saturate it before each test. The ECSA was measured by cyclic voltammetry (CV) using the same working electrodes at a potential window of 0.2-0.4 V vs. RHE in 1 M aqueous KOH solution. CV curves were obtained at different scan rates of 50, 100, 150, 200, 250, and 300  $\text{mV s}^{-1}$ . After plotting charging current density differences ( $\Delta J = J_a - J_c$  at the potential of 0.3 V) versus the scan rates, the slope, twice of the double-layer capacitance  $C_{dl}$ , is used to represent the ECSA. To test the stability of catalysts, a galvanostatic measurement at a fixed current density ( $J$ ) of  $10 \text{ mA cm}^{-2}$  was performed. AC impedance spectroscopy was acquired in a frequency range from 100 kHz to 0.1 Hz at amplitude of 10 mV.

#### 4. Supplementary Figures

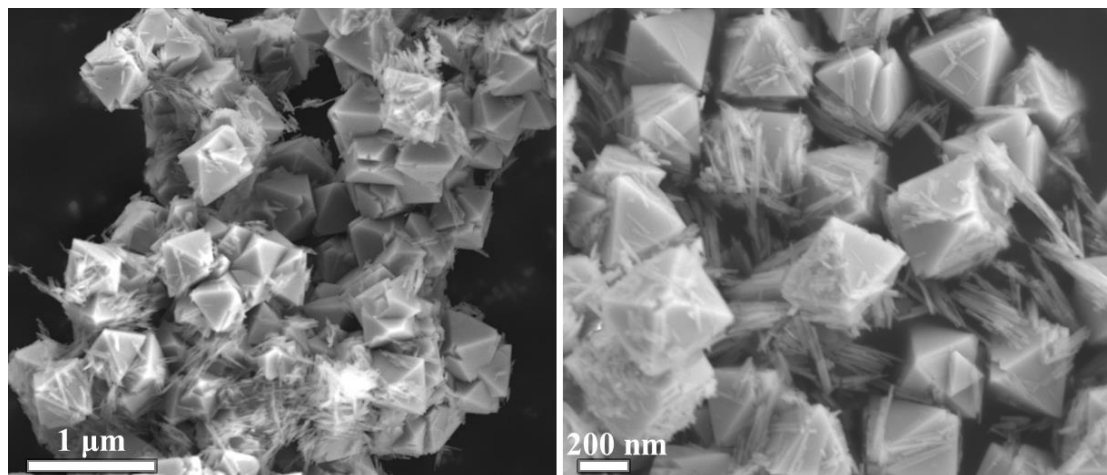

**Fig. S1.** The SEM image for CeO<sub>2</sub> nanorods with 0.01 mM of sodium dihydrogen phosphate dehydrate.



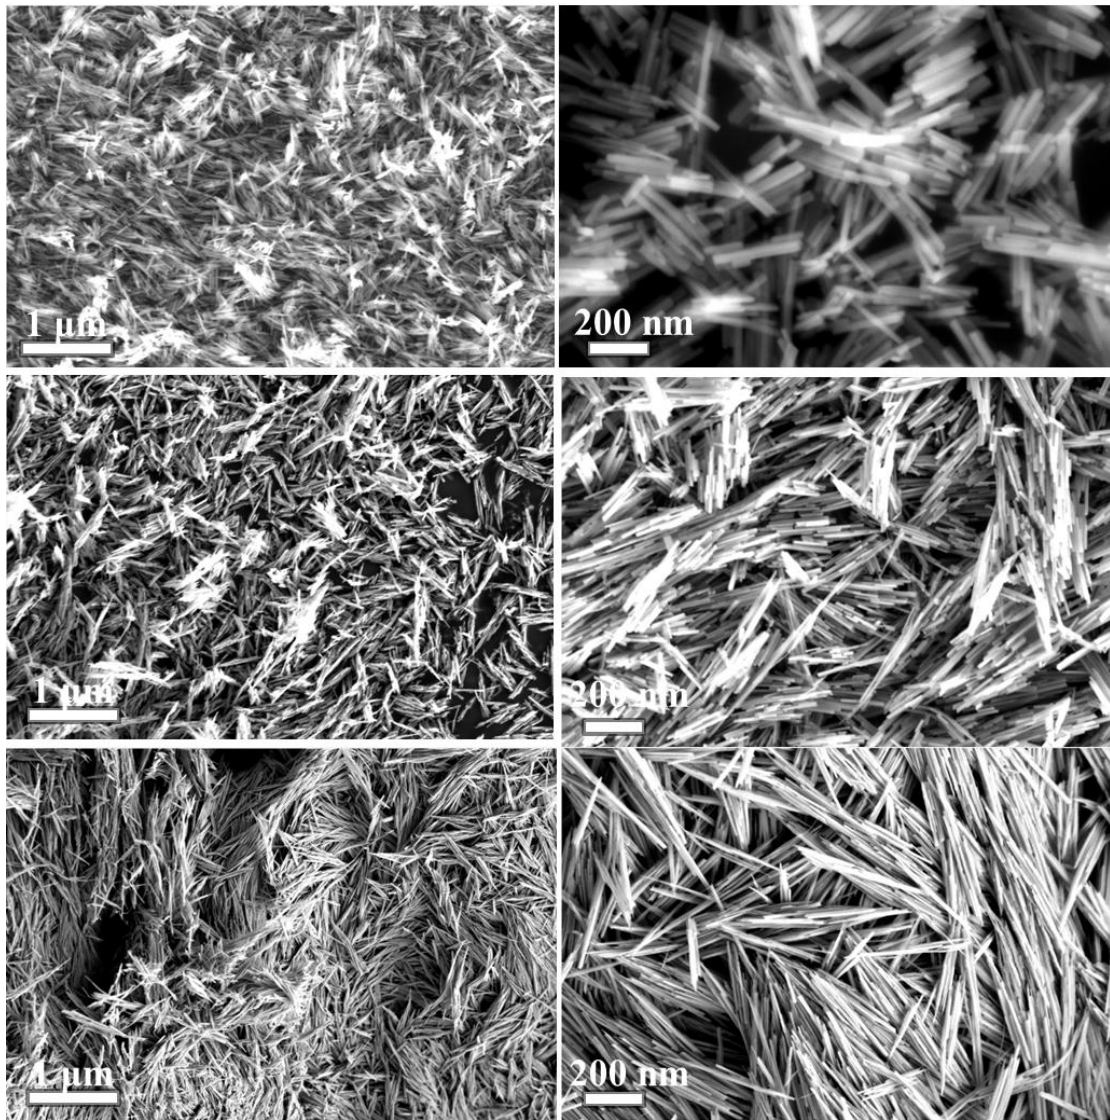

**Fig. S2.** The SEM image for CeO<sub>2</sub> nanorods with 0.05 mM, 0.1 mM and 0.2 mM of sodium dihydrogen phosphate dehydrate.

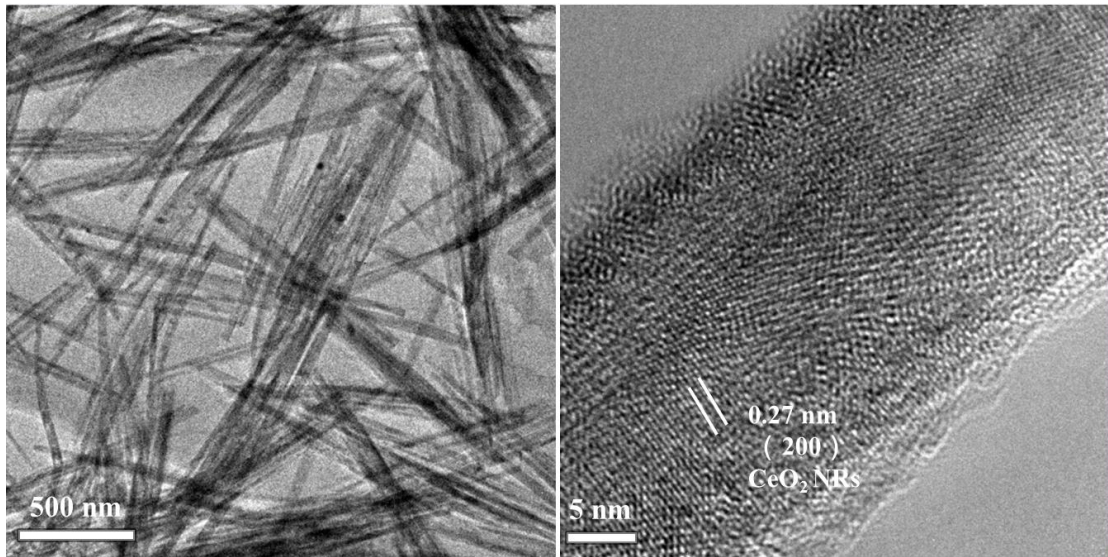

**Fig. S3.** The TEM image for CeO<sub>2</sub> nanorods with 0.2 mM of sodium dihydrogen phosphate dehydrate.

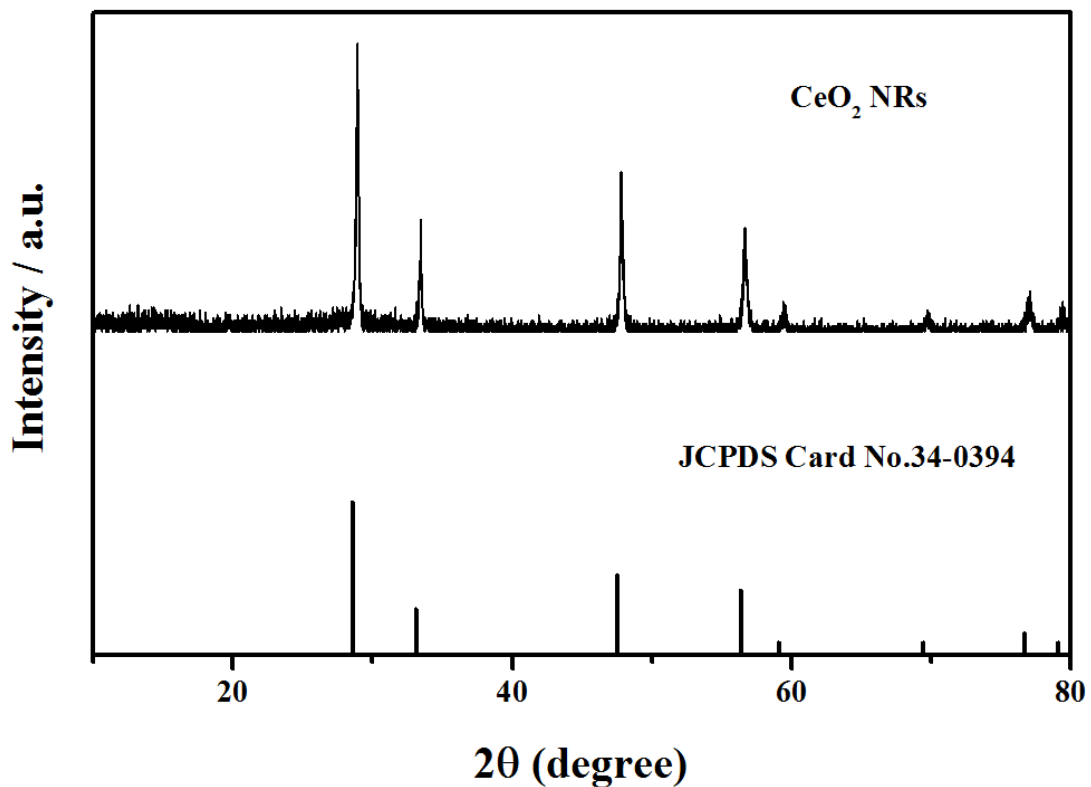

**Fig. S4.** XRD patterns for CeO<sub>2</sub> nanorods with 0.2 mM of sodium dihydrogen phosphate dehydrate.

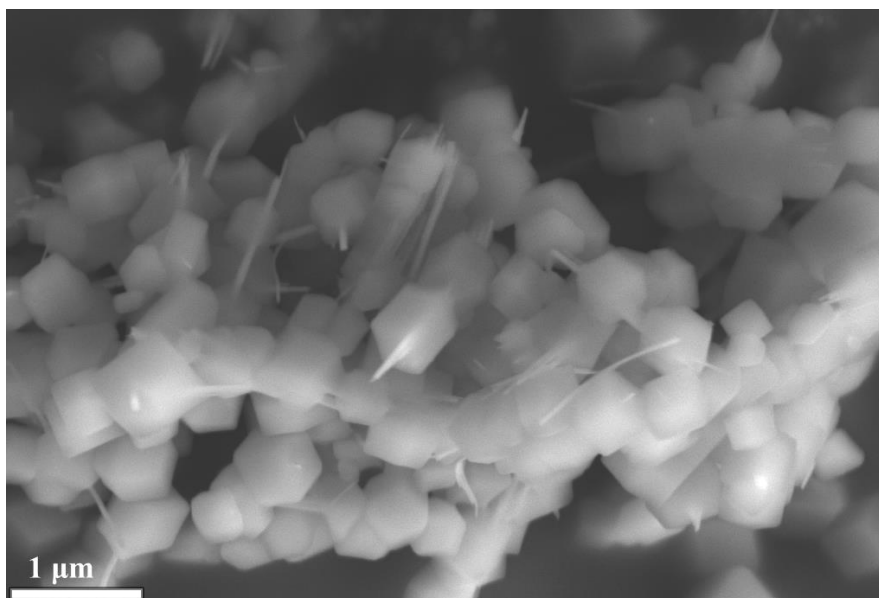

**Fig. S5.** The SEM image for ZIF-67@L-CeO<sub>2</sub>NRs.

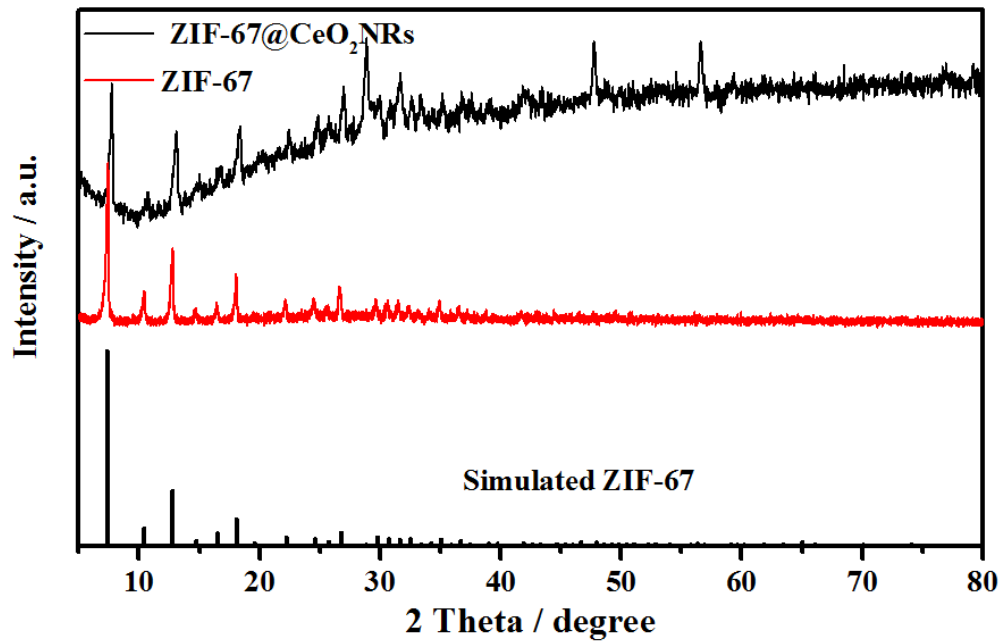

**Fig. S6.** XRD patterns of ZIF-67 and ZIF-67@L-CeO<sub>2</sub>NRs.

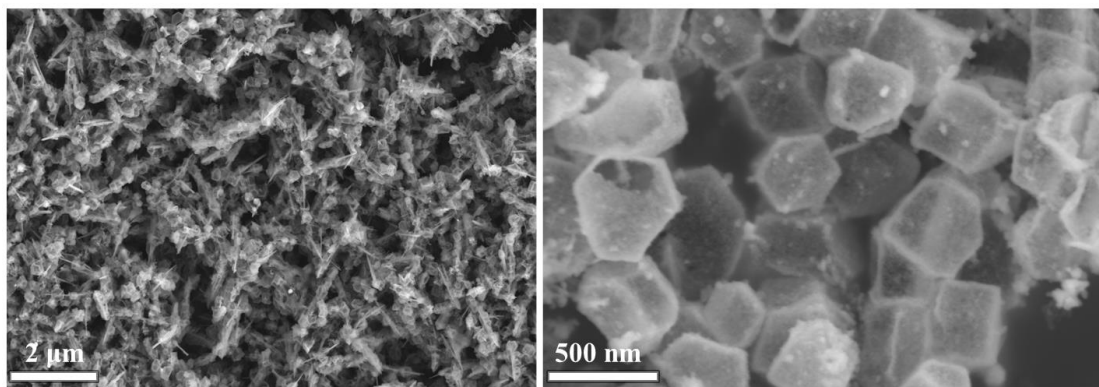

**Fig. S7.** The SEM image for  $\text{CeO}_x/\text{CoS}@L\text{-CeO}_2\text{NRs}$ .

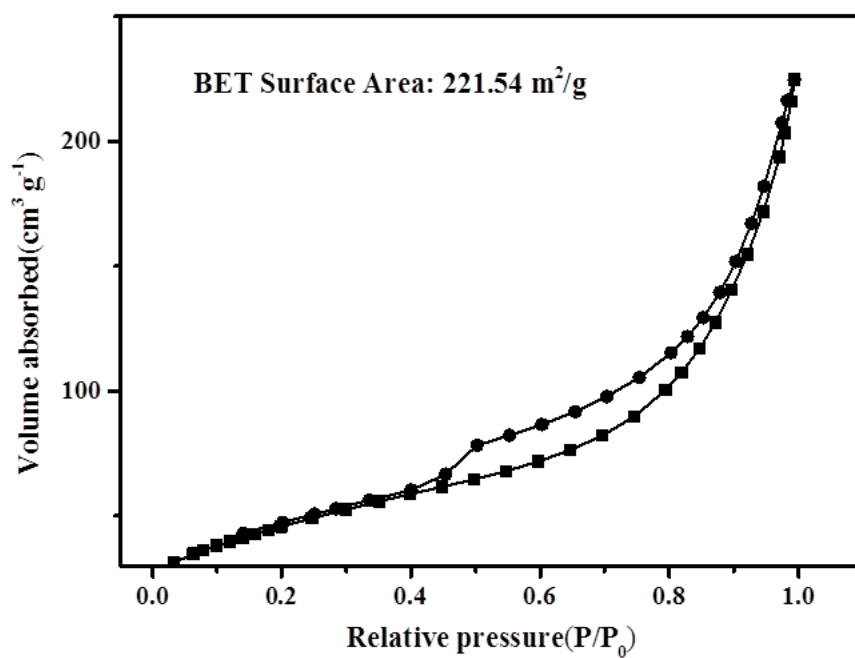

**Fig. S8.**  $\text{N}_2$  adsorption/desorption isotherms of  $\text{CeO}_x/\text{CoS}@L\text{-CeO}_2\text{NRs}$ .

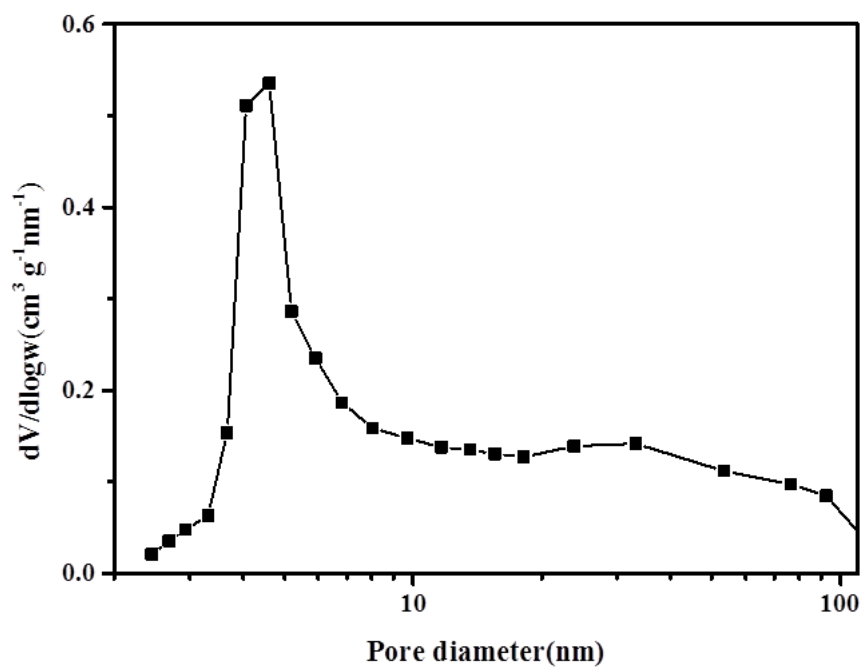

**Fig. S9.** Pore size distribution of CeO<sub>x</sub>/CoS@L-CeO<sub>2</sub>NRs.

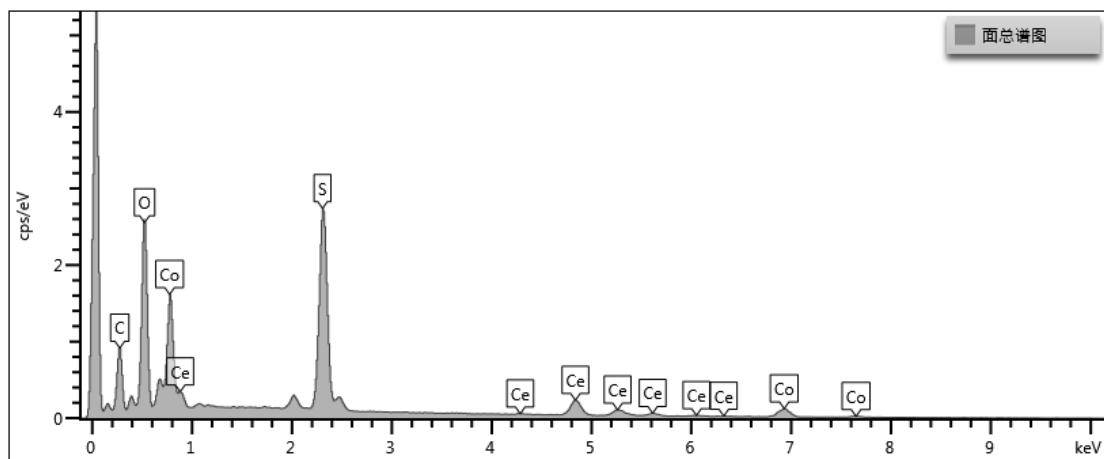

**Fig. S10.** EDX spectrum of CeO<sub>x</sub>/CoS@L-CeO<sub>2</sub>NRs.



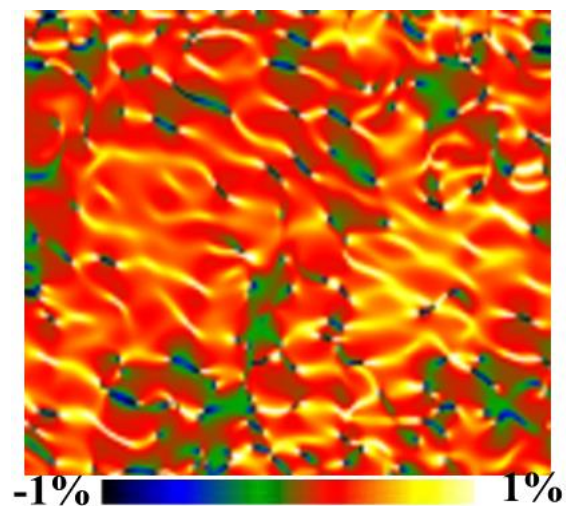

**Fig. S11** The strain tensor map generated from the HRTEM image on the surface of  $\text{CeO}_x/\text{CoS}$  polyhedrons using geometric phase analysis.

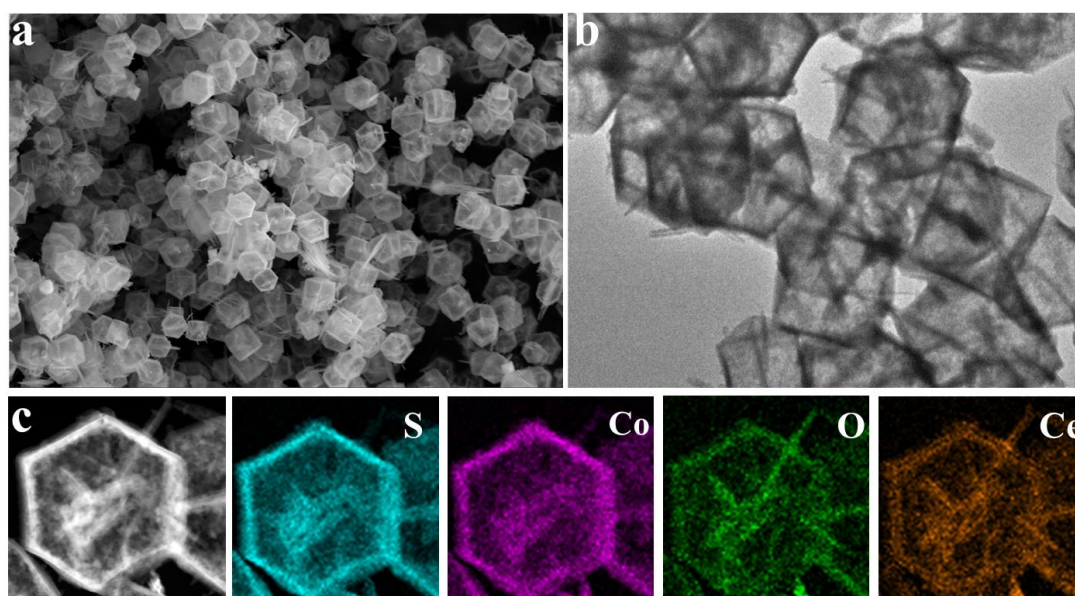

**Fig. S12.** The SEM and TEM images for  $\text{CeO}_x/\text{CoS}@S\text{-CeO}_2\text{NRs}$  (a and b). c) Elemental mapping images of  $\text{CeO}_x/\text{CoS}@S\text{-CeO}_2\text{NRs}$ .

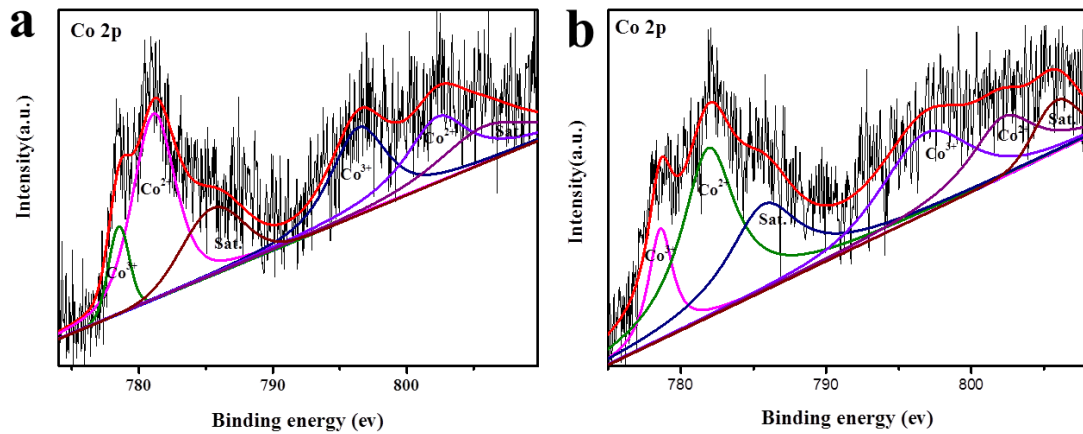

**Fig. S13.** XPS spectra of Co 2p for CeO<sub>x</sub>/CoS@L-CeO<sub>2</sub>NRs (a) and CeO<sub>x</sub>/CoS@S-CeO<sub>2</sub>NRs (b).

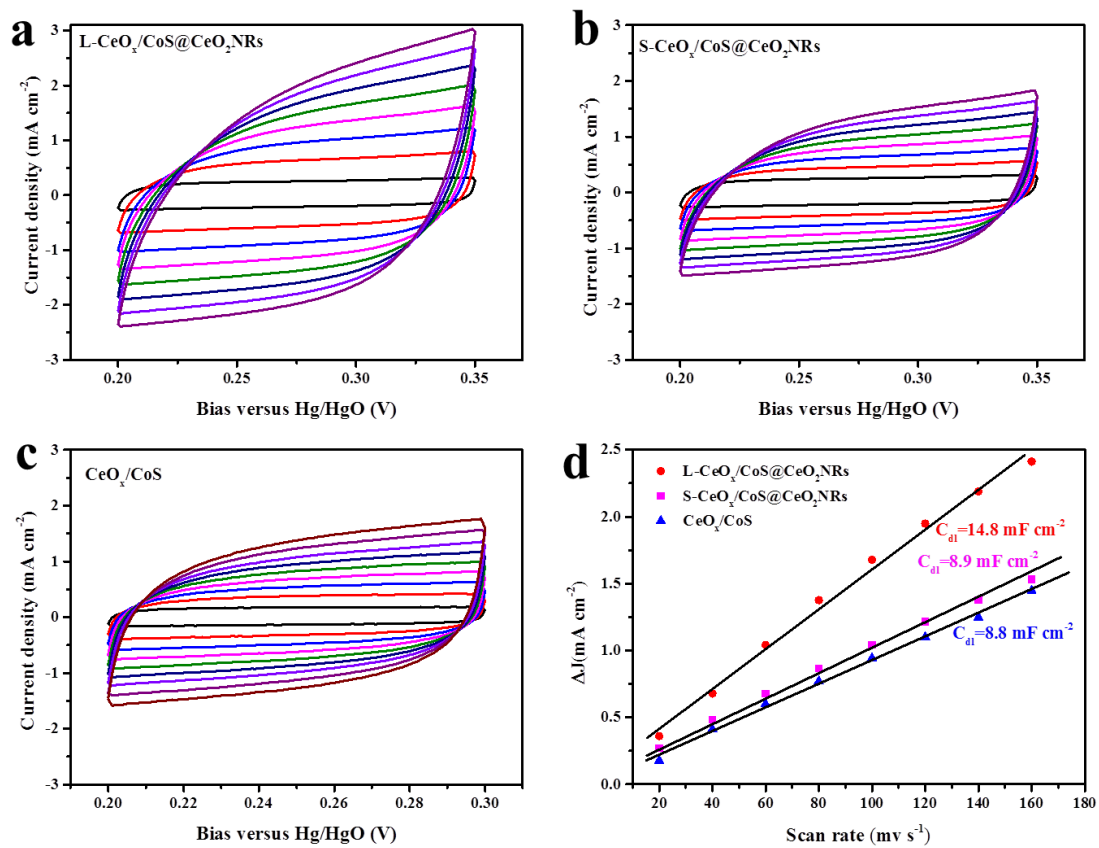

**Fig. S14.** (a-c). Typical cyclic voltammetry curves of CeO<sub>x</sub>/CoS@L-CeO<sub>2</sub>NRs, CeO<sub>x</sub>/CoS@S-CeO<sub>2</sub>NRs and CeO<sub>x</sub>/CoS in 1M KOH with different scan rates. d. Capacitive J versus scan rate for CeO<sub>x</sub>/CoS@L-CeO<sub>2</sub>NRs, CeO<sub>x</sub>/CoS@S-CeO<sub>2</sub>NRs and CeO<sub>x</sub>/CoS.

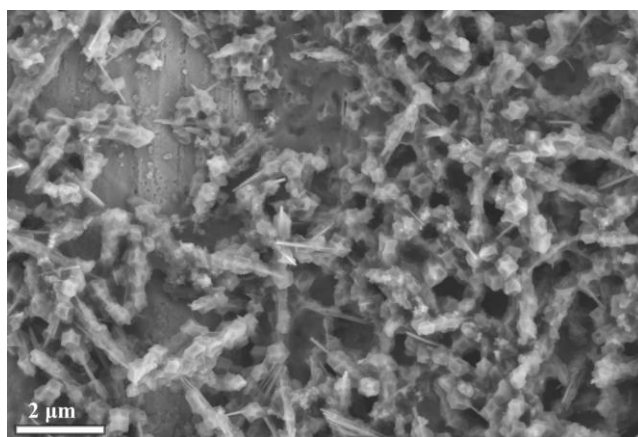

**Fig. S15.** SEM micrograph of  $\text{CeO}_x/\text{CoS}@L\text{-CeO}_2\text{NRs}$  after the OER reaction.

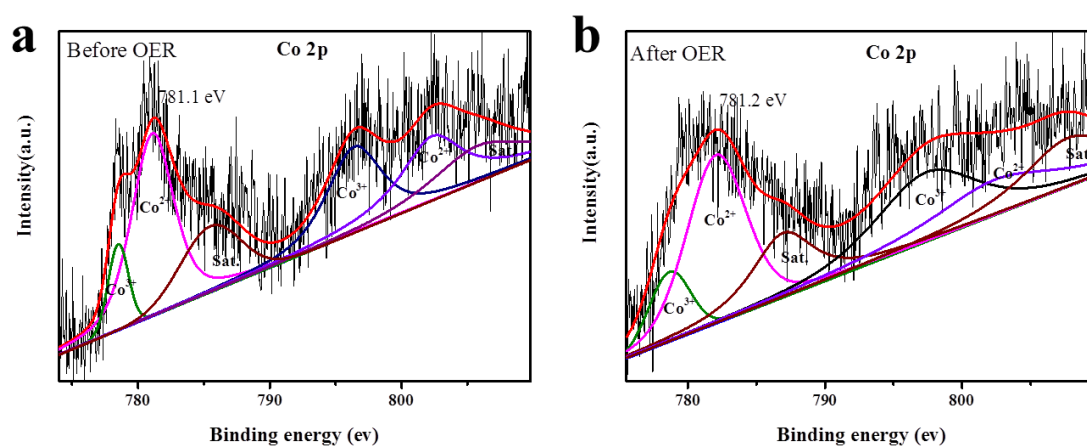

**Fig. S16.** XPS spectra of Co 2p before and after the OER reaction for  $\text{CeO}_x/\text{CoS}@L\text{-CeO}_2\text{NRs}$ .



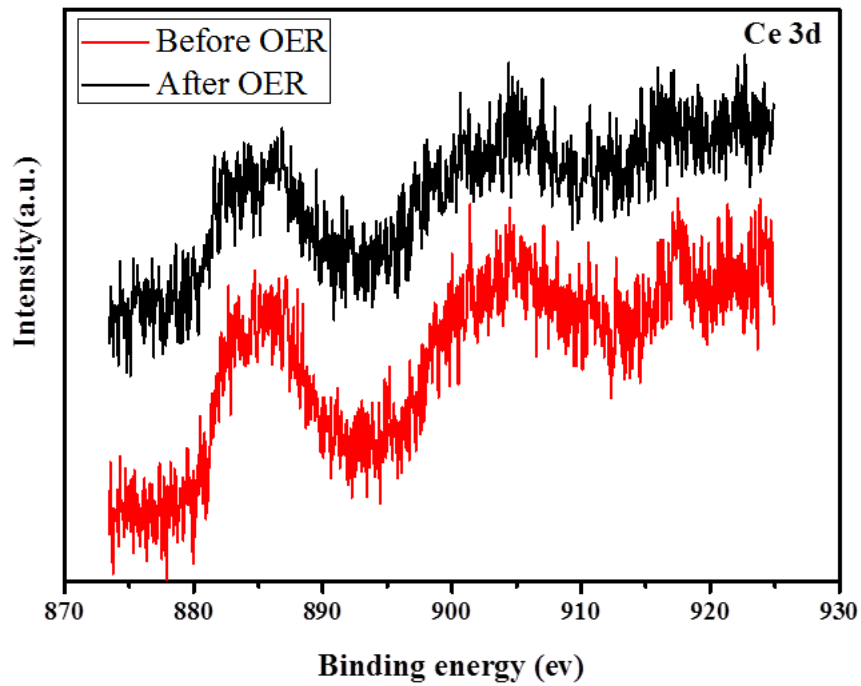

**Fig. S17.** XPS spectra of Ce 3d before and after the OER reaction for  $\text{CeO}_x/\text{CoS}@L\text{-CeO}_2\text{NRs}$ .

## 5. Supplementary Tables

Table S1 Comparison of catalytic performance with reported Co-based catalyst.

| Catalyst                                                         | Support         | Electrolyte | $\eta$ @10mA<br>cm <sup>-2</sup> (mV) | Tafel slope<br>(mV dec <sup>-1</sup> ) | Ref.                                                    |
|------------------------------------------------------------------|-----------------|-------------|---------------------------------------|----------------------------------------|---------------------------------------------------------|
| CoMnP                                                            | GC              | 1M KOH      | 284                                   | 61                                     | J. Am. Chem. Soc. <b>2016</b> , 138, 4006.              |
| Co <sub>3</sub> O <sub>4</sub> /Co-Fe<br>oxide DSNBs             | GC              | 1M KOH      | 297                                   | 61                                     | Adv. Mater. 2018, 1801211.                              |
| Co <sub>3</sub> S <sub>4</sub> @MoS <sub>2</sub>                 | GC              | 1M KOH      | 310                                   | 59                                     | Chem. Mater. <b>2017</b> , 29, 5566-5573.               |
| Co <sub>3</sub> O <sub>4</sub> /NiCo <sub>2</sub> O <sub>4</sub> | Ni foam         | 1M KOH      | 340                                   | 88                                     | J. Am. Chem. Soc. <b>2015</b> , 137,<br>5590-5595.      |
| Co-P Film                                                        | GC              | 1M KOH      | 345                                   | 47                                     | Angew. Chem. Int. Ed. <b>2015</b> , 54,<br>6251-6254.   |
| Cobalt Sulfide                                                   | Carbon<br>Paper | 1M KOH      | 306                                   | 72                                     | ACS Nano. <b>2016</b> , 10, 2342-2348.                  |
| NiCo <sub>2</sub> O <sub>4</sub>                                 | GC              | 1M KOH      | 250                                   | 50                                     | J. Am. Chem. Soc. 2018, 140, 13644.                     |
| Co <sub>3</sub> O <sub>4</sub> NW                                | CC              | 1M KOH      | 320                                   | 72                                     | Angew. Chem. Int. Ed. <b>2015</b> , 54,<br>14710.       |
| Co@Co <sub>3</sub> O <sub>4</sub> /NC                            | GC              | 0.1M KOH    | 410                                   | 54.3                                   | Angew. Chem. Int. Ed. <b>2016</b> , 55, 4087.           |
| Co <sub>9</sub> S <sub>8</sub> @NOSC<br>-900                     | Ni foam         | 1M KOH      | 330                                   | 68                                     | Adv. Funct. Mater, <b>2017</b> , 27. 1606585.           |
| CoO <sub>x</sub> -ZIF                                            | GC              | 1M KOH      | 310                                   | 70.3                                   | Adv. Funct. Mater. <b>2017</b> , 27, 1702546            |
| N-CG-CoO                                                         | GC              | 1M KOH      | 340                                   | 70                                     | Energ. Environ. Sci. 2014, 7, 609-616.                  |
| Mn-Co                                                            | GC              | 1M KOH      | 320                                   | 52                                     | Angew. Chem. Int. Edit. <b>2017</b> , 56,<br>2386-2389. |
| NiCoP/C                                                          | GC              | 1M KOH      | 330                                   | 96                                     | Angew. Chem. Int. Ed. <b>2017</b> , 56,<br>3897-3958.   |
| N-doped                                                          | GC              | 1M KOH      | 280                                   | 82.7                                   | Energ. Environ. Sci. <b>2016</b> , 9,<br>1320-1326.     |
| Co <sub>0.9</sub> S <sub>0.58</sub> P <sub>0.42</sub>            | GC              | 1M KOH      | 266                                   | 48                                     | ACS Nano. <b>2017</b> , 11, 11031-11040.                |
| CuCo <sub>2</sub> S <sub>4</sub><br>nanosheets                   | GC              | 1M KOH      | 310                                   | 98                                     | ACS Catal. <b>2017</b> , 7, 5871-5879.                  |
| A-CoS <sub>4.6</sub> O <sub>0.6</sub><br>PNCs                    | GC              | 1M KOH      | 290                                   | 67                                     | Angew. Chem. Int. Ed. <b>2017</b> , 56,<br>4858-4861.   |
| G-FeCoW                                                          | Gold Ni<br>foam | 1M KOH      | 190                                   | 37                                     | Science. <b>2016</b> , 352, 6583.                       |
| N-Co <sub>9</sub> S <sub>8</sub> /G                              | RDE             | 0.1M KOH    | 410                                   | 83                                     | Energy Environ. Sci. <b>2016</b> , 9, 1320.             |
| CeO <sub>x</sub> /CoS                                            | GC              | 1M KOH      | 269                                   | 50                                     | Angew.Chem. Int.Ed. 2018, 57,8654.                      |
| CeO <sub>x</sub> /CoS-@<br>S-CeO <sub>2</sub> NRs                | GC              | 1M KOH      | 268                                   | 48                                     | This work                                               |
| CeO <sub>x</sub> /CoS-@<br>L-CeO <sub>2</sub> NRs                | GC              | 1M KOH      | 238                                   | 42                                     | This work                                               |
